# Supplementary material
Source: PubMed Central journal article supplement (PMC1855037)

**A**

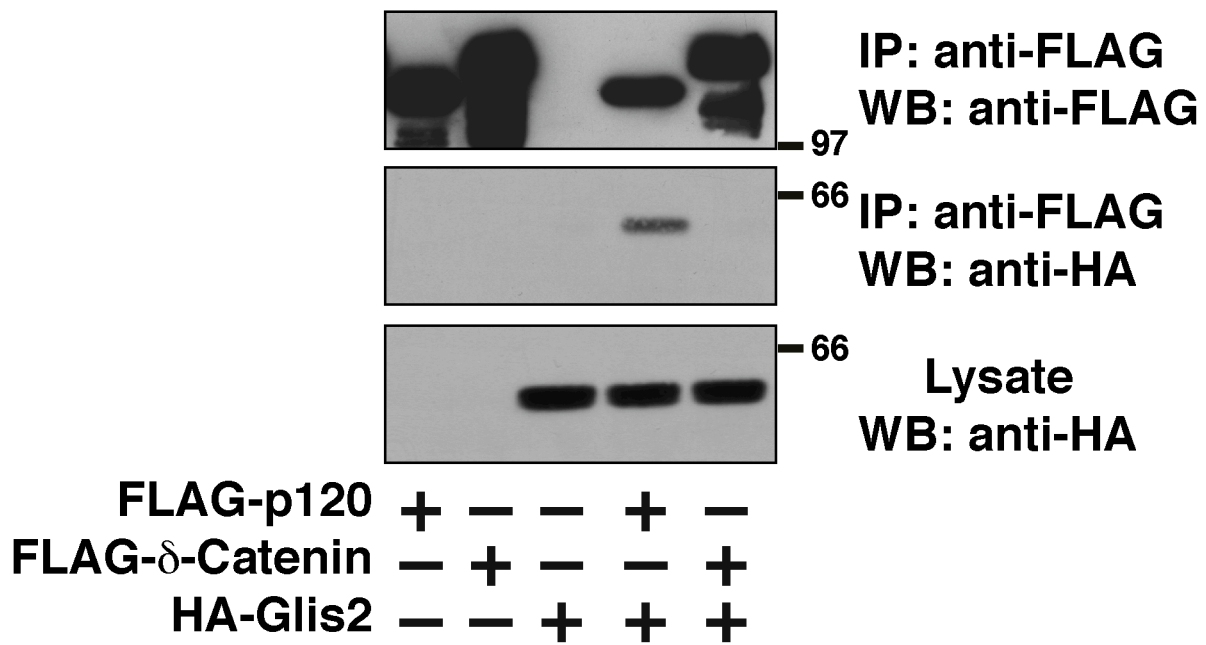

**B**

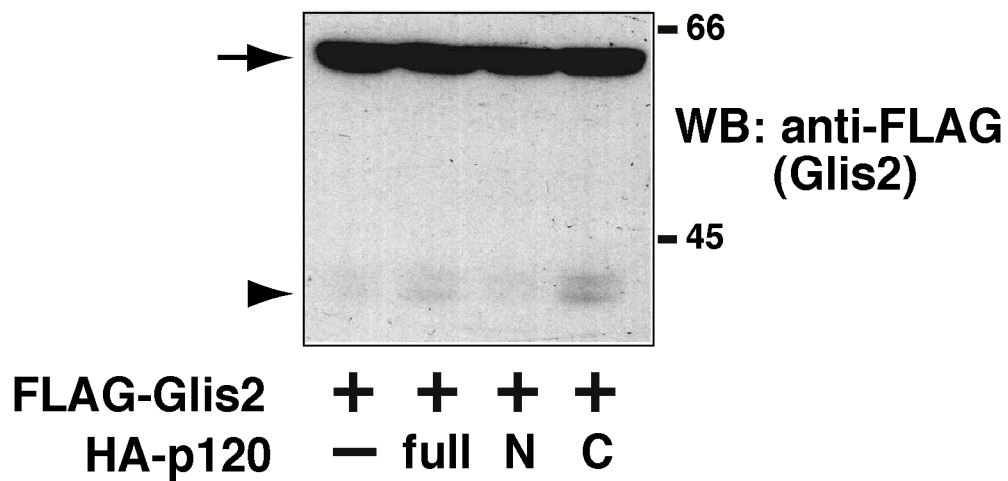

**C**

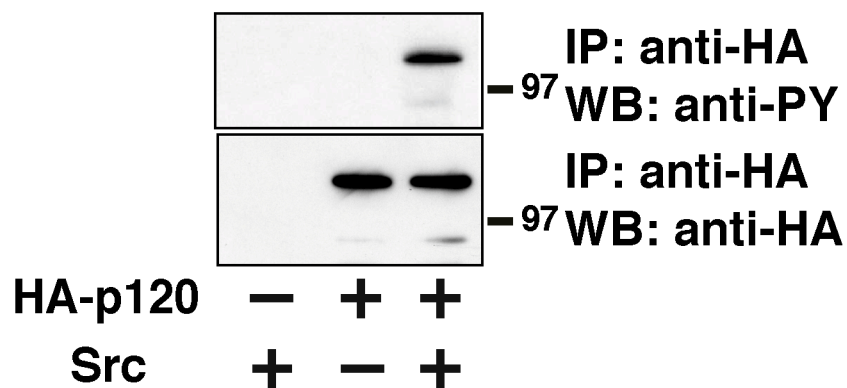

Supplement: mbc_E06-10-0941_1.pdf [file mbc_E06-10-0941_1.pdf]

**A**

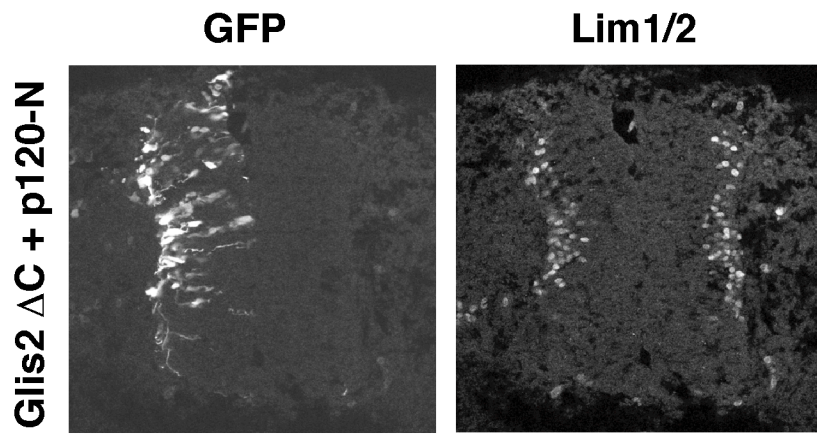

**B**

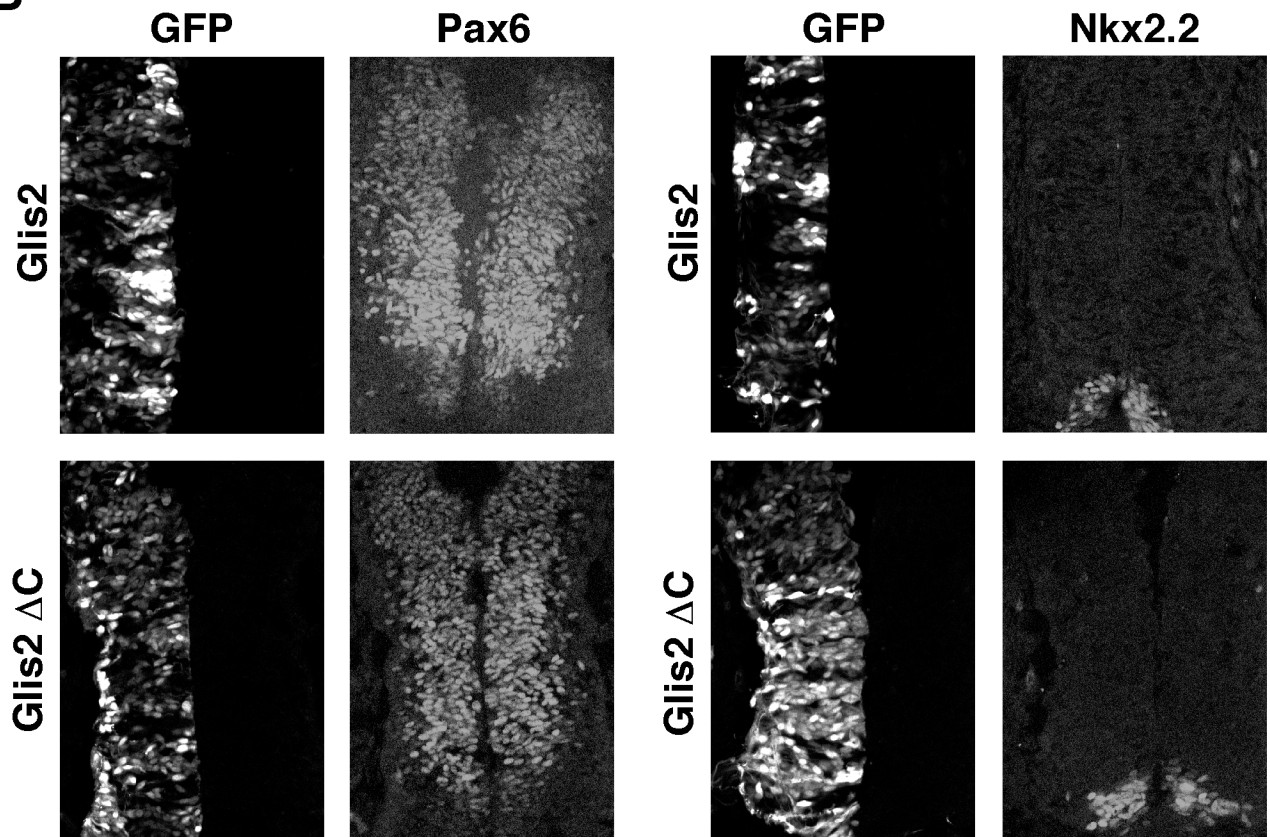

**Figs. S2A & B**  
**Hosking et al.**

Supplement: mbc_E06-10-0941_2.pdf [file mbc_E06-10-0941_2.pdf]
